# Supplementary material
Source: Royal Society of Chemistry journal article supplement (doi:10.1039/d5fo03782d)
Supplement: d5fo03782d1.pdf [file d5fo03782d1.pdf]

## **Supplementary Material**

### **Evaluation of Underutilized *Malpighia glabra* L. Fruits as a Functional Food: Nutritional Composition, Phenolic Profile, Biological Activities, and Synergistic Effects with Pharmaceutical Drugs**

**Table S1.** Fragment ions of 24 authentic standards of phenolics using liquid chromatography-electrospray ionization-tandem mass spectrometry (LC-ESI-MS/MS) in selective reaction monitoring (SRM) mode\*.

| Compounds | Standards                 | Ion mass | Parent ions ( $m/z$ ) | SRM transitions ( $m/z$ ) and collision energy (V)      | RF lens (V) |
|-----------|---------------------------|----------|-----------------------|---------------------------------------------------------|-------------|
| 1         | Epigallocatechin gallate  | [M-H]    | 457.175               | 305.155 (16.84 V), 168.97 (17.59 V), 125.042 (40.30 V)  | 204         |
| 2         | Gallic acid               | [M-H]    | 169.05                | 124.988 (14.56 V), 96.917 (18.77 V), 79.185 (22.94 V)   | 147         |
| 3         | 3,4-Dihydroxybenzoic acid | [M-H]    | 152.95                | 109.113 (14.35 V), 81.042 (20.50 V), 91.042 (24.59 V)   | 128         |
| 4         | Chlorogenic acid          | [M-H]    | 353.075               | 179.042 (14.06 V), 191.000 (16.54 V), 85.095 (39.96 V)  | 148         |
| 5         | Mangiferin                | [M+H]    | 423.10                | 273.054 (23.58V), 303.113 (17.76V), 327.071(16.88V)     | 108         |
| 6         | 4-Hydroxybenic acid       | [M-H]    | 137.05                | 92.970 (14.86 V), 65.000 (29.39 V), 75.000 (31.96 V)    | 110         |
| 7         | Caffeic acid              | [M-H]    | 179.038               | 135.054 (15.07 V), 107.071 (22.57 V), 85.042 (31.96 V)  | 151         |
| 8         | Syringic acid             | [M-H]    | 197.138               | 182.185 (13.72 V), 167.113 (19.24 V), 123.095 (22.31 V) | 130         |
| 9         | Vanillic acid             | [M-H]    | 167.000               | 123.042 (11.66 V), 151.97 (14.59 V), 108.042 (18.65 V)  | 114         |
| 10        | <i>p</i> -Coumaric acid   | [M+H]    | 165.05                | 147.054 (11.70 V), 119.113 (19.36 V), 91.125 (25.89 V)  | 90          |
| 11        | Rutin                     | [M+H]    | 611.20                | 303.13 (20.80), 465.20 (12.71V)                         | 198         |
| 12        | Sinapic acid              | [M-H]    | 223.25                | 208.125 (13.51 V), 164.024 (15.78 V), 192.970 (22.65 V) | 141         |
| 13        | Ferulic acid              | [M-H]    | 192.95                | 149.125 (11.28 V), 177.970 (13.05 V), 134.042 (16.50 V) | 124         |
| 14        | Hesperidin                | [M-H]    | 609.30                | 301.179 (24.50 V), 325.179 (27.83 V), 286.125 (41.60 V) | 299         |
| 15        | Myricetin                 | [M-H]    | 317.088               | 178.970 (19.53 V), 150.988 (24.50 V), 137.113 (26.86 V) | 245         |
| 16        | Rosmarinic acid           | [M-H]    | 359.20                | 197.000 (15.70 V), 161.113 (17.38 V), 133.054 (37.81 V) | 175         |
| 17        | Fisetin                   | [M+H]    | 287.05                | 213.054(27.96V), 137.042 (30.86V), 241.125(25.09V)      | 244         |
| 18        | Luteolin                  | [M-H]    | 285.138               | 197.000 (15.70 V), 161.113 (17.38 V), 133.054 (37.81 V) | 241         |
| 19        | Quercetin                 | [M-H]    | 301.200               | 178.976 (18.18 V), 273.125 (19.45 V), 151.042 (21.39 V) | 237         |
| 20        | Cinnamic acid             | [M-H]    | 147.00                | 103.00 (11.23V), 77.083 (23.07)                         | 107         |
| 21        | Apigenin                  | [M-H]    | 269.075               | 116.863 (34.28 V), 149.071 (25.13 V), 151.131 (25.05 V) | 244         |
| 22        | Genistein                 | [M-H]    | 269.138               | 224.054 (25.60 V), 159.054 (29.26 V), 132.929 (30.95 V) | 239         |
| 23        | Naringenin                | [M+H]    | 272.938               | 146.97 (21.01 V), 153.054 (24.42 V), 119.000 (31.28 V)  | 160         |
| 24        | Kaempferol                | [M-H]    | 285.150               | 184.911 (25.85 V), 239.113 (27.03 V), 186.988 (28.17 V) | 260         |
| 25        | Isorhamnetin              | [M-H]    | 315.088               | 300.000 (21.30 V), 150.970 (29.14 V), 271.054 (30.57 V) | 233         |
| 26        | Galangin                  | [M+H]    | 271.088               | 165.042 (28.80 V), 197.125 (31.75 V), 153.113 (32.42 V) | 248         |

\*These data are from our previous study (Sirichai et al., 2022).

**Table S2.** The validation parameters of 24 authentic standards of phenolics using liquid chromatography-electrospray ionization-tandem mass spectrometry (LC-ESI-MS/MS) in selective reaction monitoring (SRM) mode\*.

| Compounds | Retention time (min) | Standards                 | Linear range ( $\mu\text{g/mL}$ ) | Linear regression equation | Correlation coefficient ( $R^2$ ) | LOD ( $\mu\text{g/mL}$ ) | LOQ ( $\mu\text{g/mL}$ ) | %RSD (Inter-day) | %Recovery                      |                                   |                                 |
|-----------|----------------------|---------------------------|-----------------------------------|----------------------------|-----------------------------------|--------------------------|--------------------------|------------------|--------------------------------|-----------------------------------|---------------------------------|
|           |                      |                           |                                   |                            |                                   |                          |                          |                  | Low level ( $\mu\text{g/mL}$ ) | Medium level ( $\mu\text{g/mL}$ ) | High level ( $\mu\text{g/mL}$ ) |
| 1         | 0.44                 | Epigallocatechin gallate  | 0.125–40                          | $y = 8533x + 1053.4$       | 0.9985                            | 0.067                    | 0.230                    | 0.023            | 91.84                          | 85.36                             | 91.37                           |
| 2         | 0.564                | Gallic acid               | 0.195–25                          | $y = 3323.1x - 2100.4$     | 0.9984                            | 0.04                     | 0.14                     | 0.01             | 113.05                         | 118.57                            | 109.12                          |
| 3         | 0.803                | 3,4-Dihydroxybenzoic acid | 0.195–25                          | $y = 11490x - 10877$       | 0.9935                            | 0.010                    | 0.034                    | 0.003            | 90.59                          | 85.75                             | 89.75                           |
| 4         | 0.922                | Chlorogenic acid          | 0.3125–40                         | $y = 8377.5x - 3623.5$     | 0.9934                            | 0.017                    | 0.055                    | 0.006            | 91.94                          | 87.50                             | 95.02                           |
| 5         | 1.116                | Mangiferin                | 0.125–10                          | $y = 7516.2x + 195.48$     | 0.9985                            | 0.040                    | 0.130                    | 3.700            | 102.20                         | 91.14                             | 91.57                           |
| 6         | 1.16                 | 4-Hydroxybenic acid       | 0.3125–40                         | $y = 2482.6x - 3998.4$     | 0.9917                            | 0.027                    | 0.090                    | 0.009            | 109.67                         | 103.60                            | 101.28                          |
| 7         | 1.40                 | Caffeic acid              | 0.3125–40                         | $y = 12328x - 19725$       | 0.9918                            | 0.010                    | 0.035                    | 0.003            | 105.36                         | 93.98                             | 87.41                           |
| 8         | 1.539                | Syringic acid             | 3.125–100                         | $y = 68.091x + 230.43$     | 0.9955                            | 0.582                    | 1.939                    | 0.194            | 116.35                         | 97.42                             | 94.91                           |
| 9         | 1.63                 | Vanillic acid             | 2.5–100                           | $y = 213.67x - 975.72$     | 0.9900                            | 0.15                     | 0.48                     | 0.05             | 99.86                          | 101.76                            | 100.12                          |
| 10        | 2.452                | <i>p</i> -Coumaric acid   | 0.3125–40                         | $y = 8532.4x - 13559$      | 0.9910                            | 0.013                    | 0.042                    | 0.004            | 88.22                          | 81.36                             | 98.05                           |
| 11        | 2.737                | Rutin                     | 0.009–1.25                        | $y = 49729x - 33.064$      | 0.9999                            | 0.001                    | 0.005                    | 0.0005           | 94.63                          | 114.00                            | 108.73                          |
| 12        | 2.772                | Sinapic acid              | 0.39–25                           | $y = 1592.6x - 832.22$     | 0.9977                            | 0.026                    | 0.086                    | 0.009            | 81.34                          | 92.16                             | 84.22                           |
| 13        | 2.851                | Ferulic acid              | 1.56–100                          | $y = 559.03x - 1819.2$     | 0.9947                            | 0.155                    | 0.518                    | 0.052            | 91.51                          | 89.24                             | 93.10                           |
| 14        | 3.41                 | Hesperidin                | 0.25–40                           | $y = 838.63x - 242.2$      | 0.9986                            | 0.07                     | 0.22                     | 0.02             | 100.43                         | 104.06                            | 108.60                          |
| 15        | 3.431                | Myricetin                 | 1.25–40                           | $y = 303.47x - 601.81$     | 0.9976                            | 0.261                    | 0.871                    | 0.087            | 113.07                         | 81.77                             | 91.12                           |
| 16        | 3.528                | Rosmarinic acid           | 0.3125–40                         | $y = 4322.4x - 3744.1$     | 0.9956                            | 0.07                     | 0.25                     | 0.02             | 92.45                          | 106.35                            | 99.62                           |
| 17        | 3.620                | Fisetin                   | 0.25–10                           | $y = 7468.4x - 701.27$     | 0.9979                            | 0.150                    | 0.490                    | 6.900            | 98.01                          | 108.94                            | 117.51                          |
| 18        | 4.158                | Luteolin                  | 0.195–12.5                        | $y = 8381.9x - 5000.7$     | 0.9945                            | 0.015                    | 0.050                    | 0.0005           | 84.21                          | 96.21                             | 107.09                          |
| 19        | 4.185                | Quercetin                 | 0.05–12.5                         | $y = 2934x + 917.17$       | 0.9937                            | 0.05                     | 0.18                     | 0.02             | 83.36                          | 115.06                            | 95.74                           |
| 20        | 4.522                | Cinnamic acid             | 0.039–10                          | $y = 6631.9x - 866.59$     | 0.9964                            | 0.049                    | 0.163                    | 0.016            | 101.94                         | 98.84                             | 95.85                           |
| 21        | 4.689                | Apigenin                  | 0.34–11                           | $y = 1790.7x - 287.7$      | 0.9997                            | 0.127                    | 0.424                    | 0.042            | 88.84                          | 106.89                            | 114.79                          |
| 22        | 4.693                | Genistein                 | 0.625–40                          | $y = 1247.2x - 1747.1$     | 0.9977                            | 0.049                    | 0.163                    | 0.016            | 95.33                          | 101.49                            | 11633                           |
| 23        | 4.705                | Naringenin                | 0.0008–5                          | $y = 16755x + 443.03$      | 0.9932                            | 0.003                    | 0.011                    | 0.001            | 117.92                         | 96.26                             | 111.08                          |
| 24        | 4.79                 | Kaempferol                | 0.25–10                           | $y = 1006.8x - 346.28$     | 0.9905                            | 0.122                    | 0.406                    | 0.041            | 92.35                          | 107.69                            | 102.17                          |
| 25        | 4.878                | Isorhamnetin              | 0.0098–2.5                        | $y = 12698x + 586.16$      | 0.9945                            | 0.016                    | 0.052                    | 0.005            | 113.57                         | 105.88                            | 111.14                          |
| 26        | 6.146                | Galangin                  | 0.3125–40                         | $y = 5012.1x - 9354.7$     | 0.9879                            | 0.010                    | 0.035                    | 0.003            | 84.01                          | 112.92                            | 115.80                          |

\*These data are from our previous study (Sirichai et al., 2022)

**Table S3.** A liquid chromatography-electrospray ionization-tandem mass spectrometry (LC-ESI-MS/MS) integration result of *Malpighia glabra* L. extract.

| No | Peak Name                 | Retention time (min) | Quantitation ion | Area (counts*min) | Height (counts) | Overall ion ratio Confirmation |
|----|---------------------------|----------------------|------------------|-------------------|-----------------|--------------------------------|
| 1  | ECG                       | 0.462                | 168.97           | 7                 | 109             | Not confirmed                  |
| 2  | Gallic acid               | 0.470                | 124.99           | 12                | 1430            | Not confirmed                  |
| 3  | Chlorogenic acid          | 0.679                | 191.00           | 81                | 912             | Not confirmed                  |
| 4  | 3,4-Dihydroxybenzoic acid | 0.781                | 109.11           | 2032              | 11557           | Not confirmed                  |
| 5  | Mangiferin                | 1.162                | 273.05           | 20                | 1291            | Not confirmed                  |
| 6  | 4-Hydroxybenzoic acid     | 1.262                | 92.97            | 122               | 3265            | Not confirmed                  |
| 7  | Syringic acid             | 1.499                | 182.18           | 10                | 207             | Not confirmed                  |
| 8  | Caffeic acid              | 1.564                | 135.00           | 492               | 5342            | Not confirmed                  |
| 9  | Vanillic acid             | n.a.                 | 151.97           | n.a.              | n.a.            | Not confirmed                  |
| 10 | p-Coumaric acid           | 2.520                | 147.05           | 26                | 2850            | Not confirmed                  |
| 11 | Rutin                     | 2.719                | 303.13           | 2336              | 52101           | Confirmed                      |
| 12 | Ferulic acid              | 2.843                | 134.04           | 3                 | 389             | Not confirmed                  |
| 13 | Sinapic acid              | 2.858                | 208.13           | 17                | 1030            | Not confirmed                  |
| 14 | Hesperidin                | 3.378                | 301.18           | 28                | 535             | Not confirmed                  |
| 15 | Myricetin                 | n.a.                 | 150.99           | n.a.              | n.a.            | Not confirmed                  |
| 16 | Rosmarinic acid           | 3.534                | 161.11           | 12                | 442             | Not confirmed                  |
| 17 | Fisetin                   | 3.649                | 213.05           | 1012              | 26042           | Not confirmed                  |
| 18 | Quercetin                 | n.a.                 | 151.04           | n.a.              | n.a.            | Not confirmed                  |
| 19 | Luteolin                  | 4.204                | 133.07           | 113               | 1861            | Not confirmed                  |
| 20 | Cinnamic acid             | 4.571                | 103.00           | 31                | 2492            | Not confirmed                  |
| 21 | Genistein                 | n.a.                 | 132.93           | n.a.              | n.a.            | Not confirmed                  |
| 22 | Apigenin                  | 4.714                | 116.86           | 2                 | 65              | Not confirmed                  |
| 23 | Naringenin                | 4.749                | 153.05           | 503               | 10747           | Not confirmed                  |
| 24 | Kaempferol                | 4.822                | 239.11           | 595               | 6300            | Not confirmed                  |
| 25 | Isorhamnetin              | 4.931                | 300.00           | 243               | 4878            | Not confirmed                  |
| 26 | Galangin                  | 6.180                | 153.11           | 4                 | 290             | Not confirmed                  |

## Reference

Sirichai, P., Kittibunchakul, S., Thangsiri, S., On-Nom, N., Chupeerach, C., Temviriyankul, P., Inthachat, W., Nuchuchua, O., Aursalung, A., Sahasakul, Y., Charoenkiatkul, S., Suttisansanee, U., Impact of drying processes on phenolics and in vitro health-related activities of indigenous plants in Thailand, *Plants (Basel)*. 11(3) (2022), doi: 10.3390/plants11030294.
